# Supplementary material for: Evidence of a New Crystalline Phase of Prednisolone Obtained from the Study of the Hydration–Dehydration Mechanisms of the Sesquihydrate
Source: Pharmaceutics. 2023 Jun 9;15(6):1694. doi: 10.3390/pharmaceutics15061694 (PMC10301155; doi:10.3390/pharmaceutics15061694)
Supplement: Supplementary file 1 [file pharmaceutics-15-01694-s001.zip]

Archive with 4 entries (4 files):
- pharmaceutics-2409944-supplementary.pdf
- Video S1.HT-microscopy of prednisolone sequihydrate part A (100-111íπ).mp4
- Video S2.HT-microscopy of prednisolone sequihydrate part B (111-120íπC).mp4
- Video S3.HT-microscopy of prednisolone sequihydrate part  C (120-150íπC).mp4
